# Supplementary material
Source: PubMed Central journal article supplement (PMC10082845)
Supplement: 41533_2023_340_MOESM1_ESM.pdf [file 41533_2023_340_MOESM1_ESM.pdf]

Supplementary files

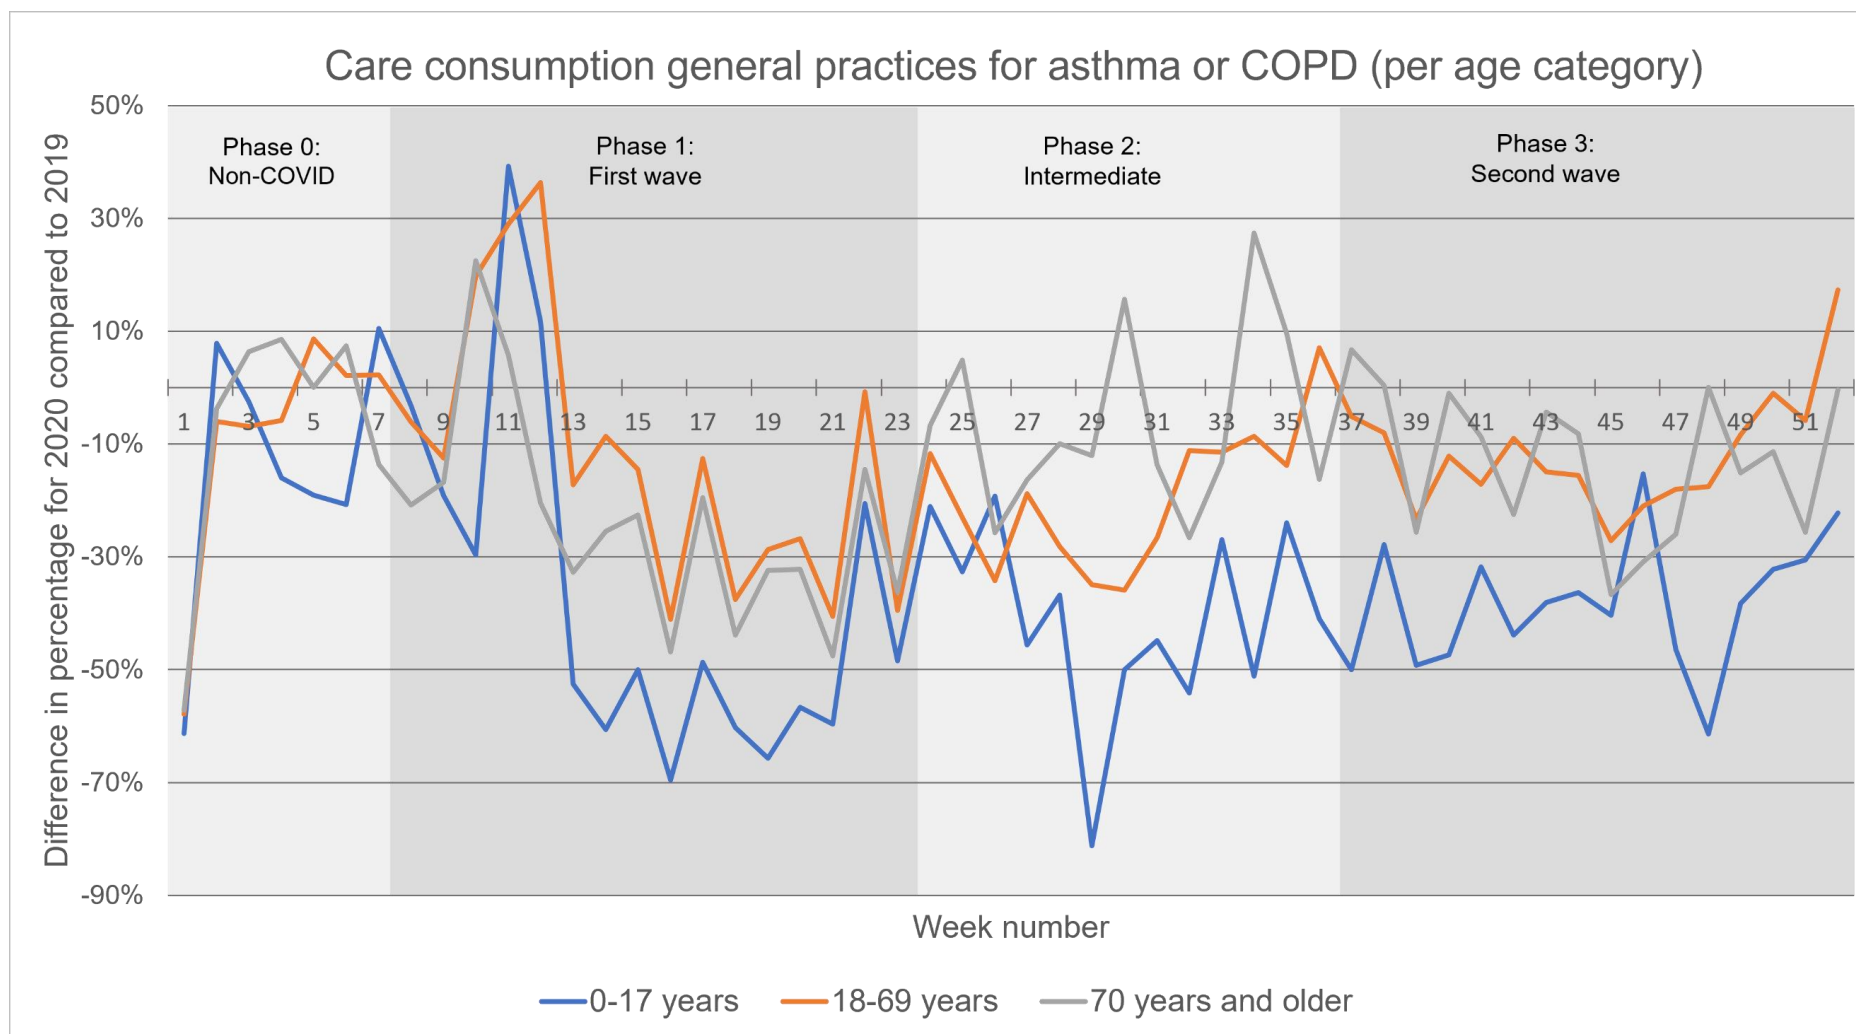

Supplementary Figure 1. The difference in care consumption in GP practices for asthma or COPD, 2020 compared to 2019 – per age category.

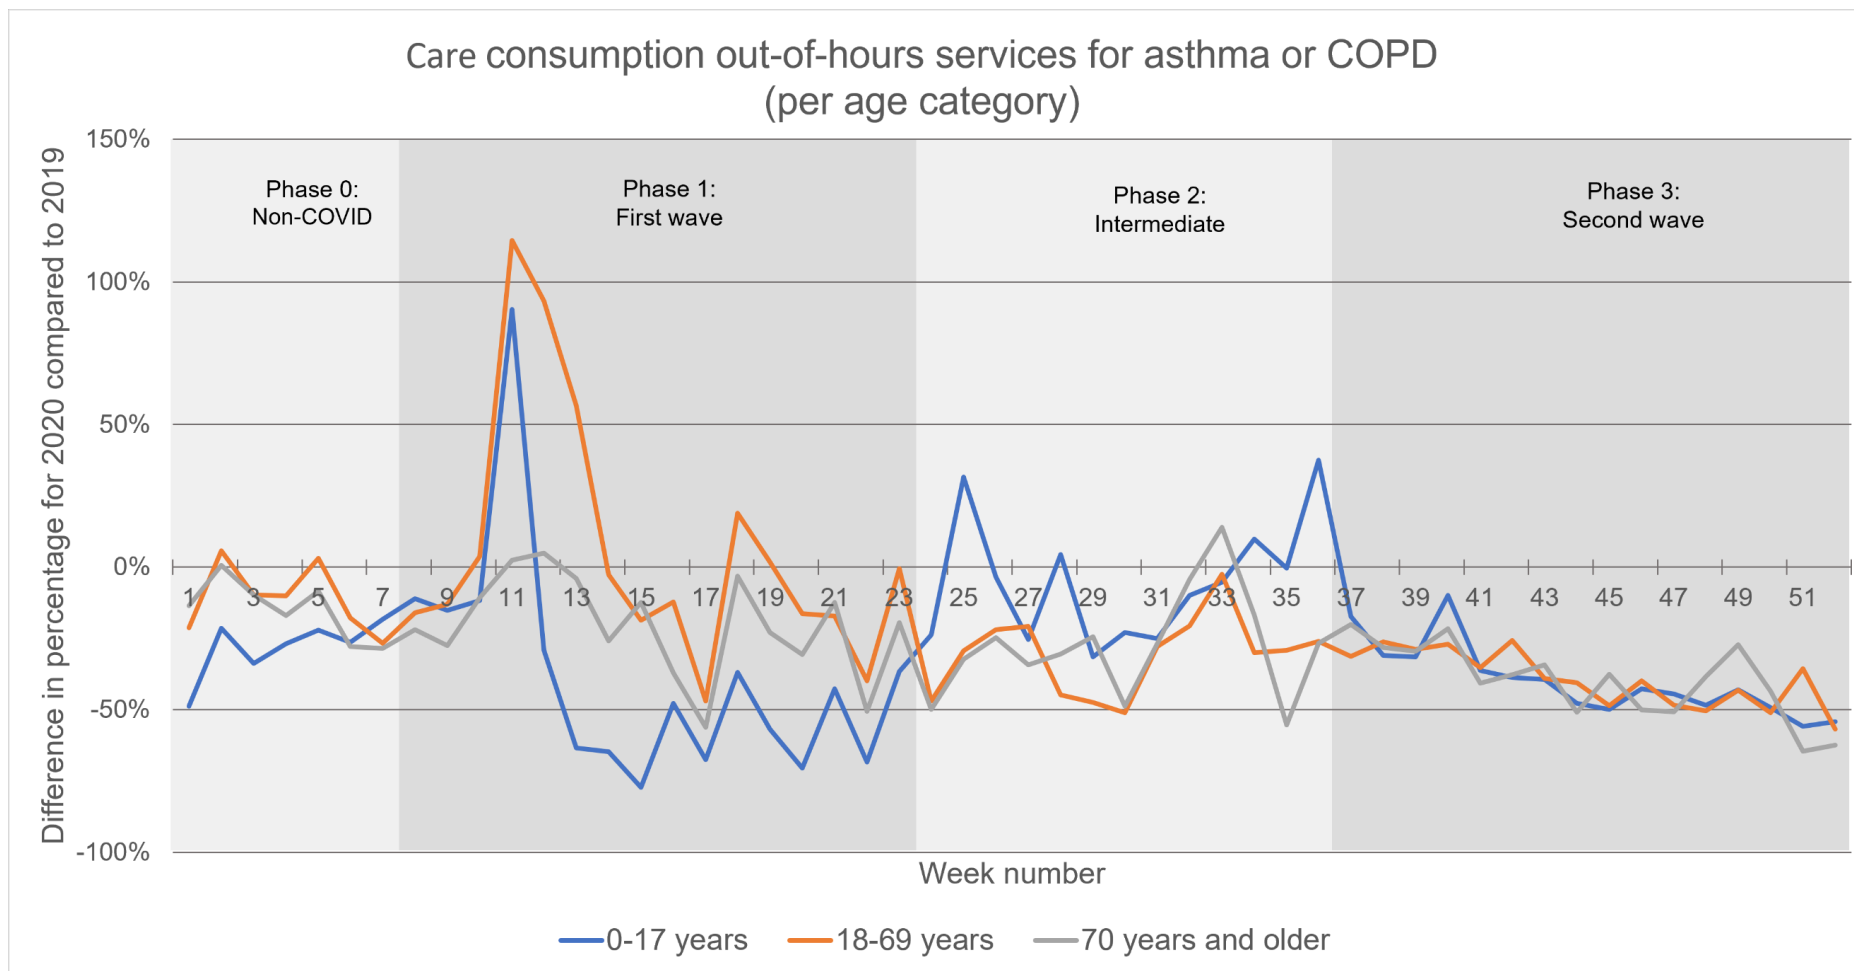

Supplementary Figure 2. The difference in care consumption at OOH services for asthma or COPD, 2020 compared to 2019 – per age category.
